# Supplementary material
Source: MDPI journal article supplement (https://www.mdpi.com/2073-4441/13/3/292)
Supplement: s1 [file s1]

## Supplementary Materials: S1

### Questionnaires for Fisheries Based Eco-tourism

#### Boatman

1) What is your name?

Answer:

2) How old are you?

Answer:

3) How many years are you in this profession?

Answer:

4) How many members are in your family? How many children? How old are they?

Answer:

5) Are your children studying? In which classes did they read? Answer: 1) **yes** 2) **No**,

Answer:

6) Did you go to school? How far classes did you completed? Answer: 1) **yes** 2) **No**,

Answer:

7) Where do you live in?

Answer:

8) Do the tourists communicate with you? Answer: 1) **yes** 2) **No**, Answer:

9) Do they show eagerness about your fishing type? Answer: 1) **yes** 2) **No**, Answer:

10) Where they love to travel most?

Answer:

11) Is there any sitting arrangement for the tourists in your boat? Answer: 1) **yes** 2)

**No**, Answer:

12) Is there any security system for them?

Answer:

13) Do they want to catch fish by net with you? Have you any fishing arrangement for them?

Answer:

14) Do they go to fishing in large number?

Answer:

15) Did you get any benefit from them and what are they?

Answer:

16) Is there any problem formed by the tourists?

Answer:

17) Is Fisheries based Ecotourism suitable in Saint Martin? Can it be actualized?

Answer:

18) Have there any obstacles to substantiate this project?

Answer:

19) Will this project bear any potentiality? What do you think?

Answer:

20) Do you know about ecotourism?

Answer:

21) What do you think, how this plan be substantiated?

Answer:

22) Does governance take any initiatives? Answer:

23) Do you take any initiatives to concern the tourists about environment?

Answer: Yes.

24) Do you get any convenience from the governance? Answer:

Observation of Interviewer (If any):

Name of Interviewer:

Date:

**Tour Operator**

1) What is your name?

Answer:

2) What is your occupation?

Answer:

3) Did you go to school? How far classes did you completed?

Answer:

4) What is the name of your tour agency? Have you any study on tourism?

Answer:

5) What is your designation in agency?

Answer:

6) How many years are you in this profession?

Answer:

7) Where are you operating the tour?

Answer:

8) How many tourist you operate in a season or a year? Are tourists increasing or decreasing?

Answer:

9) What do you know about ecotourism?

Answer:

10) Environment pollution and tourism in Saint Martin, How do you see? What is the condition of environment and tourism here?

Answer:

11) Have you any suggestion to conserve environment and increase tourist?

Answer:

12) What's the problem tourists are facing here?

Answer:

13) What's the tourist's expectation?

Answer:

14) Do they want to go for hook fishing?

Answer:

15) Is Fisheries based Ecotourism suitable in Saint Martin? Can it be actualized?

Answer:

16) Have there any obstacles to substantiate this project?

Answer:

17) How can it possible to substantiate this project?

Answer:

18) Will this project bear any potentiality? What do you think?

Answer:

19) Do you know about blue economy? It is an idea to enriched economy by the sustainable use of marine resources.

Answer:

Observation of Interviewer (If any):

Name of Interviewer:

Date:

Questionnaire for Travelers

1. What's your name?

Ans:

2. How many times do you visit Saint Martin?

Ans:

3. Can you tell me about your organization?

Ans:

4. Do you see any changes in Saint Martin Island?

Ans:

5. Do you know about Ecotourism?

Ans:

6. Do you know FbE?

Ans:

7. Does FbE remain here?

Ans:

8. What system needs to be adopting to attract people?

Ans:

9. What are obstacles to Manage ecotourism and FbE?

Ans:

10. What do you know about Blue economy?

Ans:

11. Do you know about global warming and how is it effecting in this Island?

Ans:

12. To develop awareness about Eco-Tourism, what should to do?

Ans:

Observation of Interviewer (If any):

Name of Interviewer:

Date:

**(Beach Staff)**

1. What is your name?

Ans:

2. How old are you?

Ans:

3. Did you go to school? How far classes did you completed?

Ans:

4. What is your profession?

Ans:

5. How many years have you been working?

Ans:

6. How is the condition of law and order in St. Martin?

7. Ans:

8. How much will you give law enforcement to 10?

Ans:

9. How much will you give the total status of St. Martin to 10?

Ans:

10. Do you feel disturbed by the tourists?

Ans:

11. Do you know the term "Ecotourism"?

Ans:

12. What to do to establish ecotourism in St. Martin?

13. Ans:

14. Is there any NGO here?

Ans:

15. What to do to attract tourists?

Ans:

16. What is the probability of FbE in St. Martin?

Ans:

17. Why it is not possible?

Ans:

### **Hotel businessman**

1) What is your name? Answer:

2) What is your occupation? Answer:

3) How many years are you in this profession? Answer:

4) How much residential hotel is in Saint Martin? Answer:

5) When is the most tourists' rich time? Answer:

6) How much cost of three nights at a medium quality hotel? Answer:

7) What kind of fish the tourists prefer most? Answer:

8) Do they enjoy barbeque party? Answer:

9) Barbeque with fish or chicken? Which fish are used in barbeque?

Answer:

10) Do they catch fish sluggishly? Answer:

11) What do you know about ecotourism? Environment pollution and tourism in Saint Martin, How do you see?

Answer:

12) What is the relational status between you and administration like police or other government authority?

Answer:

13) Do you have any suggestions how to conserve environment and increase tourist?

Answer:

14) Is Fisheries based Ecotourism suitable in Saint Martin? Can it be actualized?

Answer:

15) How can it possible to substantiate this project?



Answer:

16) Will this project bear any potentiality?

Answer:

Fishers-

What are the conditions needed to build and enhance the resilience and sustainability of community-based tourism in small island nations

Key Informant interviews-

1.Academics-What are the conditions needed to build and enhance the resilience and sustainability of community-based tourism in small island nations?

2.Environment Specialist-What are the conditions needed to build and enhance the resilience and sustainability of community-based tourism in small island nations?

3.Non-governmental organizations- What are the conditions needed to build and enhance the resilience and sustainability of community-based tourism in small island nations?
